# Supplementary material for: Importance of $${{d}}_{{{xy}}}$$ orbital and electron correlation in iron-based superconductors revealed by phase diagram for 1111-system
Source: Springer Nature journal article supplement (doi:10.1038/s41598-021-89231-2), 2021-05-11
Supplement: 41598_2021_89231_MOESM1_ESM.pdf [file 41598_2021_89231_MOESM1_ESM.pdf]

# Supplementary Information : Importance of $d_{xy}$ orbital and electron correlation in iron-based superconductors revealed by phase diagram for 1111-system

Tsuyoshi Kawashima<sup>1</sup>, Shigeki Miyasaka<sup>1,\*</sup>, Hirokazu Tsuji<sup>1</sup>, Takahiro Yamamoto<sup>1</sup>, Masahiro Uekubo<sup>1</sup>, Akira Takemori<sup>1</sup>, Kwing To Lai<sup>1,2</sup>, and Setsuko Tajima<sup>1</sup>

<sup>1</sup>Department of Physics, Osaka University, Toyonaka, Osaka, 560-0043, Japan

<sup>2</sup>Department of Physics, The Chinese University of Hong Kong, Shatin, Hong Kong

\*miyasaka@phys.sci.osaka-u.ac.jp

## Structural Parameters

All the polycrystalline samples of  $R\text{FeAs}_{1-x}(\text{P/Sb})_x\text{O}_{1-y}(\text{F/H})_y$  ( $R = \text{La}$  and  $\text{Nd}$ ) were characterized by synchrotron X-ray diffraction. Figure S1 shows the  $x$ -dependence of the lattice constants  $a$  and  $c$ , the pnictogen ( $Pn$ ) height from the Fe-layer ( $h_{Pn}$ ), the  $Pn$ -Fe- $Pn$  bond angle ( $\alpha$ ), and the Fe- $Pn$  bond distance ( $d_{\text{Fe}-Pn}$ ) in  $R\text{FeAs}_{1-x}(\text{P/Sb})_x\text{O}_{1-y}(\text{F/H})_y$  ( $R = \text{La}$  and  $\text{Nd}$ ). The  $x$ -dependence of the lattice constants for  $\text{LaFeAs}_{1-x}\text{P}_x\text{O}$  and  $\text{NdFeAs}_{1-x}\text{P}_x\text{O}_{0.95}\text{F}_{0.05}$  is also plotted in Figs. S1(a) and (b) for reference. The crystallographic parameters for other samples with different  $y$ -values have been shown in Fig. 1 and in our previous report<sup>1</sup>.

In all samples of  $R\text{FeAs}_{1-x}(\text{P/Sb})_x\text{O}_{1-y}(\text{F/H})_y$ , the lattice constants show linear  $x$ -dependence, indicating that P or Sb was successfully substituted for As. In addition, the structural parameters have been systematically changed by F- and H-doping. The local structural parameters  $\alpha$  and  $d_{\text{Fe}-Pn}$  were used when the contour plot of superconducting transition temperature  $T_c$  was generated in Fig. 6.

## Temperature Dependence of Resistivity

Figures S2 and S3 present the temperature ( $T$ -) dependence of resistivity for  $\text{NdFeAs}_{1-x}\text{P}_x\text{O}_{1-y}(\text{F/H})_y$  and  $\text{LaFeAs}_{1-x}\text{Sb}_x\text{O}_{1-y}(\text{F/H})_y$ , respectively. The values of  $T_c$  were determined from  $T$  for zero resistivity. The power  $n$  in  $\rho(T) = \rho_0 + AT^n$  was estimated by fitting  $\rho(T)$ . These  $T_c$  and  $n$  values were shown in Figs. 4, 5 and 6. The  $T$ -dependent resistivities for other compositions were shown in Fig. 2 and our previous reports<sup>1-3</sup>.

## References

1. Miyasaka, S. *et al.* Three superconducting phases with different categories of pairing in hole- and electron-doped  $\text{LaFeAs}_{1-x}\text{P}_x\text{O}$ . *Phys. Rev. B* **95**, 214515 (2017).
2. Miyasaka, S. *et al.* Two Fermi Surface States and Two  $T_c$ -Rising Mechanisms Revealed by Transport Properties in  $\text{RFeP}_{1-x}\text{As}_x\text{O}_{0.9}\text{F}_{0.1}$  ( $R = \text{La}, \text{Pr}, \text{and Nd}$ ). *J. Phys. Soc. Jpn.* **82**, 124706 (2013).
3. Lai, K. T. *et al.* Evolution of the phase diagram of  $\text{LaFeP}_{1-x}\text{As}_x\text{O}_{1-y}\text{F}_y$  ( $y = 0 - 0.1$ ). *Phys. Rev. B* **90**, 064504 (2014).

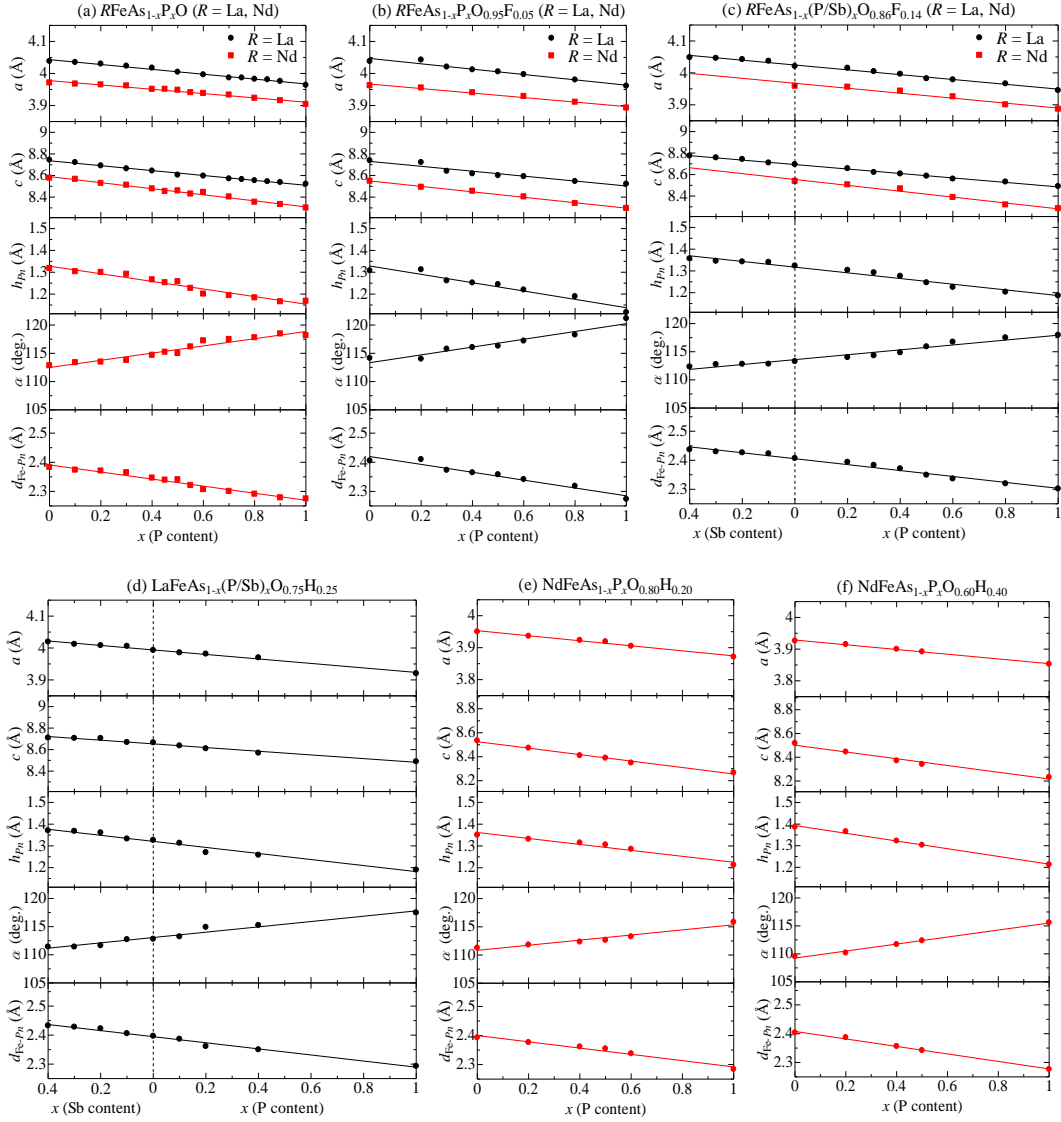

**Figure S1.**  $x$ -dependence of structural parameters: lattice constants  $a$  and  $c$ , pnictogen height from the Fe plane  $h_{Pn}$ , Pn-Fe-Pn bond angle  $\alpha$ , and Fe-Pn bond length  $d_{Fe-Pn}$ , in (a)  $RFeAs_{1-x}P_xO$  ( $R = La$  and  $Nd$ ), (b)  $RFeAs_{1-x}P_xO_{0.95}F_{0.05}$ , (c)  $RFeAs_{1-x}(P/Sb)_xO_{0.86}F_{0.14}$ , (d)  $LaFeAs_{1-x}(P/Sb)_xO_{0.75}H_{0.25}$ , (e)  $NdFeAs_{1-x}P_xO_{0.80}H_{0.20}$ , and (f)  $NdFeAs_{1-x}P_xO_{0.60}H_{0.40}$ .

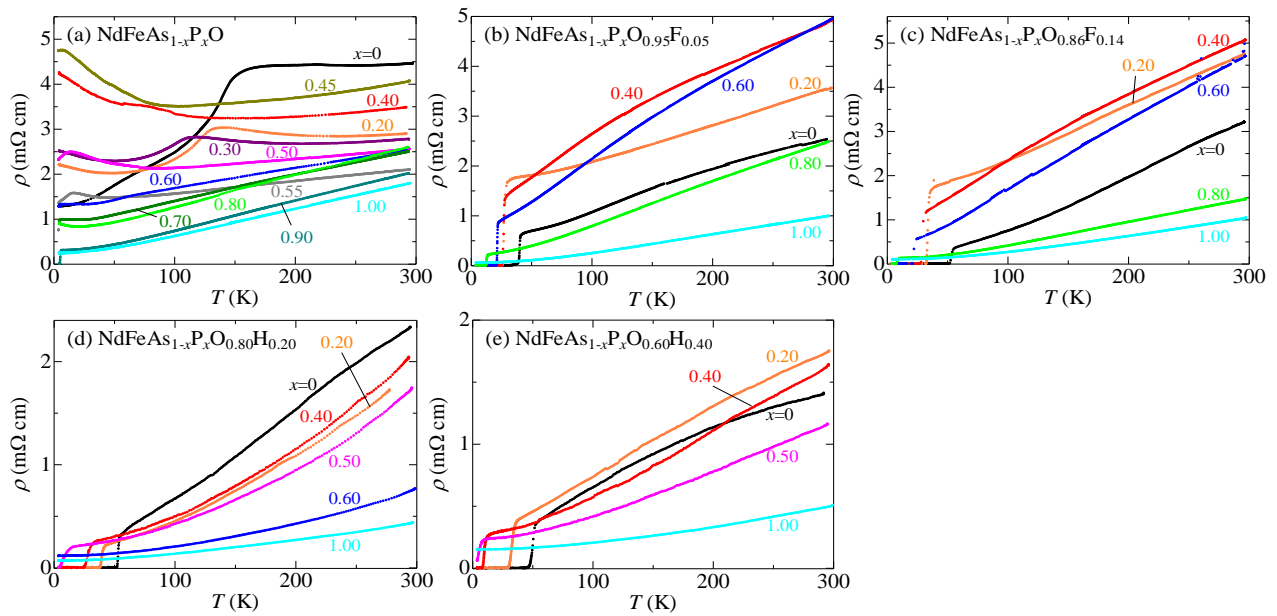

**Figure S2.** Temperature ( $T$ -) dependence of resistivity  $\rho$  for (a)  $\text{NdFeAs}_{1-x}\text{P}_x\text{O}$ , (b)  $\text{NdFeAs}_{1-x}\text{P}_x\text{O}_{0.95}\text{F}_{0.05}$ , (c)  $\text{NdFeAs}_{1-x}\text{P}_x\text{O}_{0.86}\text{F}_{0.14}$ , (d)  $\text{NdFeAs}_{1-x}\text{P}_x\text{O}_{0.80}\text{H}_{0.20}$ , and (e)  $\text{NdFeAs}_{1-x}\text{P}_x\text{O}_{0.60}\text{H}_{0.40}$  for various values of  $x$ .

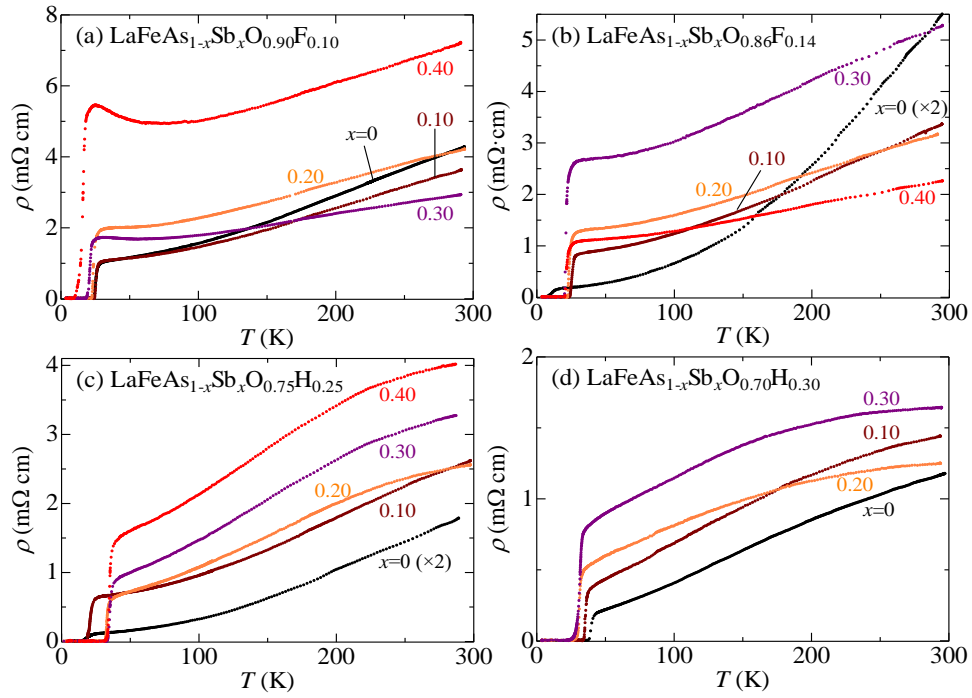

**Figure S3.** Temperature ( $T$ -) dependence of resistivity  $\rho$  for (a)  $\text{LaFeAs}_{1-x}\text{Sb}_x\text{O}_{0.90}\text{F}_{0.10}$ , (b)  $\text{LaFeAs}_{1-x}\text{Sb}_x\text{O}_{0.86}\text{F}_{0.14}$ , (c)  $\text{LaFeAs}_{1-x}\text{Sb}_x\text{O}_{0.75}\text{H}_{0.25}$ , and (d)  $\text{LaFeAs}_{1-x}\text{Sb}_x\text{O}_{0.70}\text{H}_{0.30}$ , with various values of  $x$ .
